# Supplementary material for: A phase 2 trial of peri-operative avelumab and chemotherapy for locally advanced gastro-esophageal adenocarcinoma: Association of AGR2/AP-1 complex CD8 T-cells and M2-Tumour Associated Macrophages with treatment response
Source: Research Square preprint supplement (doi:10.21203/rs.3.rs-3701293/v1), 2023-12-15
Supplement: Supplementary file 1 [file 99f36dfe47e48a08f1cf1245.xlsx]

## Sheet: Sheet1
			CD4+ central memory T cell							CD4+ effector memory cell							CD8+ Central memory T cell							Gamma-delta T cell
			Gene name	P value	average log 2 fold change	Percent expression non-responders	Percent expression responders	Adjusted P value		Gene name	P value	average log 2 fold change	Percent expression non-responders	Percent expression responders	Adjusted P value		Gene name	P value	average log 2 fold change	Percent expression non-responders	Percent expression responders	Adjusted P value		Gene name	P value	average log 2 fold change	Percent expression non-responders	Percent expression responders	Adjusted P value
			AGR2	9.80622e-48	3.30974	0.645	0.197	3.30411e-43		RPS4X	2.94382e-30	0.288852	1	0.993	9.91892e-26		JUND	9.3668e-23	-1.98994	0.964	1	3.15605e-18		MT-CO3	3.78469e-21	-0.956213	0.997	1	1.27521e-16
			JUND	6.95674e-42	-2.02883	0.914	0.985	2.344e-37		CCNL1	1.13241e-27	-1.64962	0.593	0.765	3.81554e-23		FOSB	7.22061e-10	-1.90928	0.768	0.875	2.43291e-05		AGR2	8.61113e-17	3.20364	0.828	0.333	2.90143e-12
			HSP90AA1	1.19298e-28	-1.9723	0.945	0.956	4.01962e-24		AGR2	3.00831e-26	2.10588	0.393	0.186	1.01362e-21		KLF6	1.88392e-09	-2.62245	0.857	0.812	6.34767e-05		MT-ATP6	2.0944e-16	-0.608621	1	1	7.05686e-12
			MALAT1	3.19509e-27	-1.64897	1	1	1.07655e-22		PPP1R15A	6.60664e-26	-1.65224	0.675	0.814	2.22604e-21		MALAT1	8.45324e-09	-1.49806	1	1	0.000284823		MT-CO1	4.2914e-15	-0.624337	1	1	1.44595e-10
			YPEL5	3.23436e-26	-2.21829	0.473	0.847	1.08979e-21		JUND	7.64587e-26	-1.38631	0.918	0.971	2.5762e-21		IER5	1.76934e-08	-3.02477	0.196	0.812	0.000596161		MT-CO2	4.76355e-15	-0.477861	1	1	1.60503e-10
			S100A6	1.60817e-24	0.694426	0.95	0.876	5.41855e-20		TRA2B	7.75394e-24	-1.73604	0.433	0.717	2.61261e-19		UBE2S	3.19733e-08	-2.35774	0.357	0.938	0.00107731		GNLY	4.39799e-14	3.20446	0.812	0.422	1.48186e-09
			IDS	1.4766e-23	-2.04188	0.459	0.854	4.97525e-19		RPS25	2.10691e-23	0.270089	0.987	0.974	7.09903e-19		BRD2	1.01267e-07	-2.01338	0.464	0.938	0.00341207		MT-CYB	4.4897e-14	-0.542315	0.997	1	1.51276e-09
			SRSF7	1.98401e-23	-1.9161	0.564	0.898	6.68494e-19		DDX3Y	7.95051e-23	-1.81124	0.262	0.655	2.67884e-18		HSP90AA1	2.90538e-07	-2.06266	0.946	0.875	0.00978939		MT-ND2	6.16951e-11	-0.62003	0.965	1	2.07876e-06
			SRSF5	2.60998e-23	-1.8575	0.559	0.883	8.79407e-19		HSPH1	1.19013e-22	-1.98992	0.298	0.593	4.01004e-18		ANKRD12	3.50694e-07	-2.01912	0.5	0.812	0.0118163		RGS1	1.13039e-10	-0.984186	0.774	0.933	3.80873e-06
			HNRNPH1	3.94747e-23	-2.02284	0.395	0.803	1.33006e-18		RPL18A	6.07832e-22	0.147795	0.997	0.993	2.04803e-17		TSC22D3	5.23043e-07	-2.25047	0.679	0.812	0.0176234		SRSF7	1.82048e-10	-0.771621	0.764	0.956	6.13394e-06
			RPS4X	2.34361e-22	0.0448687	1	0.993	7.89656e-18		RPL28	1.89746e-21	0.0182013	1	0.997	6.39329e-17		JUN	1.28106e-06	-2.55036	0.768	0.938	0.0431641		NEAT1	3.35944e-10	-0.797089	0.92	0.978	1.13193e-05
			EIF1	3.63723e-22	-1.32886	1	1	1.22553e-17		HSP90AA1	2.84148e-21	-1.46547	0.954	0.961	9.57407e-17		AGR2	1.29088e-06	3.07878	0.679	0.188	0.0434949		RPL37	5.92017e-10	0.873583	0.997	1	1.99474e-05
			PABPC1	5.42361e-22	-1.62056	0.773	0.934	1.82743e-17		RPS15A	3.82295e-21	0.076687	1	1	1.2881e-16		CD69	1.35901e-06	-2.09897	0.661	0.75	0.0457906		LCN2	3.31948e-09	2.39078	0.675	0.244	0.000111846
			CCNL1	6.02192e-21	-2.00311	0.527	0.839	2.02903e-16		RPS5	5.14167e-21	0.233781	0.98	0.974	1.73243e-16									S100A9	5.75719e-09	3.21926	0.557	0.022	0.000193983
			RGCC	6.31673e-20	-2.26137	0.45	0.796	2.12836e-15		RPS24	6.55512e-21	0.0822403	0.997	0.997	2.20868e-16									RPS15	6.27462e-09	0.834309	1	0.956	0.000211417
			RPS25	8.2444e-20	-0.0160159	1	0.993	2.77787e-15		RPS15	6.60833e-21	0.100544	0.997	0.993	2.22661e-16									HNRNPF	8.84677e-09	-0.698581	0.605	0.822	0.000298083
			RPS5	1.64398e-19	0.0745934	0.995	0.964	5.53923e-15		RPS8	8.82482e-21	0.119395	0.993	0.987	2.97344e-16									HLA-A	1.29757e-08	-0.443506	0.978	1	0.000437205
			SLC2A3	2.15248e-19	-2.21161	0.418	0.708	7.25257e-15		SRSF5	1.89448e-20	-1.31811	0.659	0.792	6.38327e-16									GZMA	1.46114e-08	2.20146	0.889	0.622	0.000492317
			LCN2	7.25731e-19	2.62687	0.464	0.073	2.44528e-14		RPL10	2.27123e-20	0.105313	1	0.997	7.65267e-16									HSP90AA1	1.82003e-08	-0.541489	0.984	0.956	0.00061324
			CD44	1.49411e-18	-1.75647	0.682	0.905	5.03424e-14		FOSB	3.17829e-20	-1.479	0.646	0.85	1.07089e-15									HNRNPK	2.81444e-08	-0.619801	0.796	0.844	0.000948297
			KRT19	1.9655e-18	2.2696	0.491	0.088	6.62257e-14		RPS26	1.43171e-19	0.476105	0.941	0.938	4.82399e-15									GLS	3.77291e-08	-1.04033	0.443	0.622	0.00127124
			SRSF3	1.42016e-17	-1.81353	0.505	0.803	4.78507e-13		YPEL5	3.74283e-19	-1.40662	0.548	0.769	1.26111e-14									PPIA	5.3156e-08	-0.390582	0.93	0.933	0.00179104
			RPL17	2.11542e-17	-1.54502	0.618	0.81	7.12769e-13		RPL32	1.47421e-18	0.103382	0.997	0.987	4.9672e-14									DUSP4	8.08547e-08	-0.941875	0.669	0.689	0.00272432
			RPL13A	3.32613e-17	-0.98853	1	1	1.12071e-12		KLF6	1.53653e-18	-1.42125	0.889	0.945	5.17719e-14									HSPD1	8.61015e-08	-0.671055	0.704	0.8	0.0029011
			HNRNPA2B1	6.04131e-17	-1.58148	0.8	0.927	2.03556e-12		SRSF7	7.79957e-18	-1.32552	0.754	0.857	2.62799e-13									AHNAK	1.47e-07	-1.57388	0.325	0.533	0.00495301
			KLF6	2.42975e-16	-2.02104	0.8	0.934	8.1868e-12		RPS14	8.19014e-18	0.0417307	0.997	1	2.75959e-13									HNRNPA2B1	1.54193e-07	-0.522951	0.914	1	0.00519539
			RBM39	3.3833e-16	-1.54263	0.691	0.883	1.13997e-11		SFPQ	2.44383e-17	-1.36507	0.6	0.805	8.23425e-13									RPS27	2.07534e-07	0.74623	1	1	0.00699265
			TRA2B	6.42542e-16	-2.00607	0.391	0.708	2.16498e-11		MALAT1	3.99839e-17	-1.02148	1	1	1.34722e-12									MT-ND4	2.38136e-07	-0.254311	0.994	1	0.00802377
			DDX3Y	1.03046e-15	-3.01565	0.1	0.555	3.47202e-11		IER5	5.48342e-17	-1.7193	0.344	0.635	1.84758e-12									PCNA	2.66164e-07	-1.02715	0.408	0.689	0.00896813
			RPS29	2.83293e-15	-0.904027	1	1	9.54529e-11		JUN	1.91529e-16	-1.93731	0.803	0.86	6.45338e-12									HNRNPA3	3.20923e-07	-0.476587	0.889	0.933	0.0108132
			PPP1R15A	1.07249e-14	-1.7474	0.65	0.869	3.61366e-10		RPS9	3.87906e-16	0.150272	0.99	0.987	1.30701e-11									ZBTB1	3.52911e-07	-1.03198	0.465	0.644	0.011891
			STK17B	1.34234e-14	-1.80786	0.568	0.825	4.52286e-10		RPL19	5.10035e-16	0.0644123	1	0.997	1.71851e-11									ITGA4	3.56173e-07	-1.34915	0.322	0.578	0.0120009
			HSPH1	2.54585e-14	-1.93673	0.318	0.672	8.57799e-10		RPL12	1.15543e-15	0.0722033	1	0.99	3.8931e-11									RPL41	4.79981e-07	0.720224	1	1	0.0161725
			RPL23A	3.4881e-14	-1.01836	0.941	0.993	1.17528e-09		EIF5	1.27733e-15	-1.22254	0.577	0.73	4.30384e-11									WNK1	6.43748e-07	-0.811095	0.506	0.6	0.0216905
			TUBA1A	4.59019e-14	-1.89118	0.386	0.693	1.54662e-09		MCL1	2.47837e-15	-1.25942	0.607	0.798	8.35064e-11									CHCHD2	6.77276e-07	-0.266822	0.92	0.956	0.0228201
			NR4A2	7.27243e-14	-1.85592	0.373	0.701	2.45037e-09		RPL26	2.99568e-15	0.0463762	0.993	0.993	1.00936e-10									SFPQ	6.9598e-07	-0.501419	0.742	0.889	0.0234504
			RPS8	1.26585e-13	-0.186464	1	1	4.26516e-09		UBE2S	4.99068e-15	-1.49735	0.469	0.7	1.68156e-10									PHLDA1	1.04767e-06	-1.05022	0.43	0.644	0.0353002
			BCLAF1	3.17186e-13	-1.76691	0.382	0.774	1.06873e-08		RPS3	5.07495e-15	0.0305876	0.993	0.997	1.70995e-10									FABP5	1.11574e-06	-0.718224	0.64	0.756	0.0375939
			DNAJA1	4.31539e-13	-1.64108	0.809	0.912	1.45403e-08		PLP2	5.45993e-15	0.978859	0.495	0.28	1.83967e-10									RPS19	1.20866e-06	0.714565	1	1	0.0407247
			AP000769.1	5.16962e-13	-2.35256	0.191	0.613	1.74185e-08		IDS	9.12995e-15	-1.27254	0.541	0.733	3.07625e-10									RGCC	1.24005e-06	-1.31901	0.459	0.689	0.0417824
			FOSB	5.70686e-13	-1.68486	0.582	0.839	1.92287e-08		S100A11	1.03781e-14	0.336884	0.859	0.788	3.4968e-10									MACF1	1.36418e-06	-0.724959	0.525	0.644	0.0459647
			RPL10	6.04408e-13	-0.223201	1	1	2.03649e-08		RPL6	1.24304e-14	0.0630167	0.993	0.984	4.1883e-10									MIF	1.44217e-06	1.50576	0.783	0.6	0.0485924
			BTG2	6.55325e-13	-1.61712	0.436	0.825	2.20805e-08		LMNA	1.33882e-14	-1.68624	0.502	0.694	4.51103e-10
			RPS19	1.00345e-12	-0.144945	1	1	3.38101e-08		RPS28	3.17551e-14	-0.0284969	1	0.993	1.06996e-09
			EIF5	1.17405e-12	-1.64471	0.5	0.796	3.95584e-08		RBM39	3.97223e-14	-1.05235	0.698	0.863	1.3384e-09
			ANKRD12	1.69882e-12	-1.56568	0.623	0.847	5.72399e-08		FUS	4.0609e-14	-1.08017	0.738	0.86	1.36828e-09
			ZFP36L2	1.86673e-12	-1.77474	0.65	0.854	6.28977e-08		RPS19	4.30749e-14	-0.00827643	0.997	1	1.45137e-09
			RPL18A	2.20796e-12	-0.178625	0.995	0.993	7.4395e-08		RPL39	4.87691e-14	-0.0453902	0.997	1	1.64323e-09
			ATP1B3	3.0642e-12	-1.79109	0.314	0.686	1.03245e-07		RPS23	4.92078e-14	0.0546123	0.997	0.987	1.65801e-09
			RPS26	3.37984e-12	0.580328	0.936	0.949	1.1388e-07		RPL36	5.08376e-14	0.060887	0.997	0.984	1.71292e-09
			ZC3HAV1	3.93793e-12	-1.73079	0.345	0.686	1.32685e-07		ZFP36L1	6.24025e-14	-1.28605	0.584	0.772	2.10259e-09
			FAM118A	4.65258e-12	-2.7861	0.091	0.562	1.56764e-07		RPL29	1.10158e-13	0.0362999	0.997	0.99	3.71167e-09
			SARAF	7.33261e-12	-1.31772	0.814	0.905	2.47065e-07		BRD2	1.47799e-13	-1.27621	0.439	0.687	4.97993e-09
			LINC-PINT	8.97822e-12	-1.94146	0.227	0.657	3.02512e-07		EIF4A2	1.52997e-13	-1.20074	0.593	0.756	5.15508e-09
			LGALS3	9.32719e-12	1.28992	0.459	0.212	3.1427e-07		SRSF2	1.71284e-13	-1.1725	0.633	0.756	5.77125e-09
			SRSF2	9.85064e-12	-1.47386	0.486	0.861	3.31908e-07		RPL11	1.93229e-13	-0.00105079	0.997	0.997	6.51067e-09
			RPS15	1.11997e-11	-0.169202	1	1	3.77363e-07		RPS27A	2.50678e-13	0.0107621	1	0.997	8.44635e-09
			NASP	1.46287e-11	-1.6396	0.382	0.723	4.929e-07		SRRM2	3.48535e-13	-1.18575	0.561	0.746	1.17435e-08
			ARL4C	1.7492e-11	-1.52356	0.723	0.883	5.89374e-07		RPL13	4.17169e-13	-0.0763335	1	1	1.40561e-08
			RPL12	2.09469e-11	-0.14392	1	0.993	7.05787e-07		TUBA1A	5.43076e-13	-1.32343	0.475	0.681	1.82984e-08
			TFF3	2.55193e-11	2.66429	0.377	0.022	8.59847e-07		DNAJB1	5.57455e-13	-1.3826	0.577	0.762	1.87829e-08
			MYADM	2.85563e-11	-1.8737	0.314	0.613	9.62175e-07		RPL41	5.69523e-13	-0.0330776	0.997	0.997	1.91895e-08
			SSR4	3.11551e-11	0.66111	0.727	0.657	1.04974e-06		RPL18	5.8817e-13	0.0113376	0.997	0.997	1.98178e-08
			LGALS4	3.30755e-11	2.04087	0.391	0.066	1.11445e-06		DNAJA1	6.41184e-13	-1.22455	0.875	0.886	2.1604e-08
			PPP1CB	4.24672e-11	-1.55799	0.368	0.715	1.43089e-06		TSPYL2	6.74358e-13	-1.81705	0.259	0.534	2.27218e-08
			FUS	5.49855e-11	-1.41861	0.664	0.854	1.85268e-06		FOS	1.11426e-12	-1.62956	0.734	0.85	3.75439e-08
			ZFP36	6.29617e-11	-1.59492	0.391	0.745	2.12143e-06		DDX3X	1.12854e-12	-1.18266	0.715	0.788	3.80249e-08
			S100P	7.59576e-11	2.09622	0.405	0.058	2.55931e-06		RPL30	2.29778e-12	-0.0552724	0.997	0.99	7.74215e-08
			MCL1	9.23106e-11	-1.62144	0.536	0.788	3.11031e-06		SRSF3	3.40671e-12	-1.09909	0.639	0.785	1.14786e-07
			FOS	1.44721e-10	-1.87942	0.741	0.854	4.87622e-06		MYADM	4.66958e-12	-1.32232	0.377	0.678	1.57337e-07
			SFPQ	3.15463e-10	-1.4237	0.623	0.803	1.06292e-05		BTG2	5.92078e-12	-1.26393	0.57	0.71	1.99495e-07
			FAM133B	3.22849e-10	-1.60568	0.391	0.715	1.08781e-05		RPSA	7.01253e-12	0.0871875	0.99	0.967	2.3628e-07
			PTMA	3.97552e-10	-1.07296	1	1	1.33951e-05		NR4A2	8.80234e-12	-1.38291	0.407	0.645	2.96586e-07
			DDX5	4.60586e-10	-1.29401	0.959	1	1.5519e-05		NASP	8.96864e-12	-1.22053	0.462	0.632	3.02189e-07
			RPL18	5.41725e-10	-0.2149	1	1	1.82529e-05		LTB	1.0134e-11	0.821626	0.797	0.7	3.41456e-07
			HSPA8	6.72725e-10	-1.25531	0.855	0.927	2.26668e-05		NEU1	1.43927e-11	-1.86947	0.187	0.489	4.84948e-07
			HSPD1	7.02529e-10	-1.48241	0.477	0.737	2.3671e-05		RPS3A	1.80527e-11	-0.0419626	1	1	6.08268e-07
			GLS	7.28806e-10	-1.68764	0.35	0.672	2.45564e-05		TOB1	2.22694e-11	-1.58685	0.243	0.534	7.50345e-07
			KDM6B	8.09441e-10	-1.87117	0.236	0.606	2.72733e-05		RPL8	2.29173e-11	-0.0101235	0.993	0.993	7.72176e-07
			GLIPR1	8.98755e-10	-2.00359	0.268	0.547	3.02826e-05		RSRC2	3.06164e-11	-1.18318	0.472	0.655	1.03159e-06
			PRPF38B	9.11105e-10	-1.51581	0.432	0.715	3.06988e-05		PNRC1	3.43138e-11	-1.16009	0.793	0.893	1.15617e-06
			EML4	9.81757e-10	-1.48319	0.464	0.774	3.30793e-05		COX7C	4.58282e-11	0.152034	0.925	0.886	1.54413e-06
			KRT18	1.20908e-09	1.13271	0.427	0.219	4.07387e-05		AMD1	4.76766e-11	-1.2033	0.433	0.642	1.60641e-06
			BCL11B	1.44084e-09	-1.63638	0.3	0.62	4.85476e-05		RPL15	5.95004e-11	0.0417694	0.99	0.99	2.00481e-06
			NKTR	1.61126e-09	-1.66352	0.323	0.664	5.42898e-05		HSPA1A	6.92514e-11	-2.21602	0.403	0.609	2.33336e-06
			RPL8	1.73074e-09	-0.154115	0.995	0.993	5.83157e-05		RPS21	7.6354e-11	0.125607	0.974	0.958	2.57267e-06
			BRD2	2.03983e-09	-1.50063	0.436	0.723	6.87301e-05		S100A6	7.70735e-11	0.150879	0.984	0.928	2.59692e-06
			NAP1L1	2.05218e-09	-1.24643	0.7	0.898	6.91463e-05		IFRD1	8.01363e-11	-1.61782	0.256	0.498	2.70011e-06
			TUBA1B	2.12834e-09	-1.42531	0.459	0.759	7.17121e-05		NACA	8.43164e-11	0.0821895	0.97	0.938	2.84095e-06
			COX7C	2.37816e-09	0.0820243	0.932	0.869	8.01295e-05		UBA52	1.31007e-10	0.014768	0.984	0.98	4.41416e-06
			DNAJB1	2.41631e-09	-1.54263	0.555	0.781	8.1415e-05		GLS	1.38261e-10	-1.17528	0.42	0.687	4.65855e-06
			DNAJB6	2.4222e-09	-1.45502	0.495	0.723	8.16136e-05		IFITM2	1.49638e-10	0.372652	0.702	0.671	5.04192e-06
			ARL4A	3.15559e-09	-1.73493	0.25	0.62	0.000106325		BCLAF1	1.50264e-10	-1.33487	0.374	0.596	5.06299e-06
			PDCD4	3.53124e-09	-1.43773	0.5	0.73	0.000118982		RPL10A	1.60789e-10	0.0496758	0.974	0.961	5.41762e-06
			SERF2	4.17122e-09	0.164909	0.932	0.898	0.000140545		NKTR	1.85589e-10	-1.2713	0.364	0.609	6.25324e-06
			H3F3B	4.18866e-09	-1.19196	0.968	0.985	0.000141133		H3F3B	1.93543e-10	-0.92608	0.977	0.987	6.52123e-06
			CHMP1B	4.36336e-09	-1.85446	0.245	0.569	0.000147019		RPS12	2.34886e-10	-0.0577279	0.997	0.993	7.91424e-06
			EIF4A2	4.92517e-09	-1.39412	0.486	0.752	0.000165949		RPL34	2.57135e-10	-0.0417639	0.997	1	8.66391e-06
			PPP4R3A	5.69738e-09	-1.90012	0.182	0.599	0.000191968		BTF3	3.4252e-10	0.177178	0.908	0.857	1.15409e-05
			TSC22D3	5.81777e-09	-1.47343	0.759	0.92	0.000196024		MYL6	3.56299e-10	0.185472	0.934	0.935	1.20051e-05
			MT-ND2	6.67534e-09	-1.06791	0.959	0.993	0.000224919		SLC2A3	4.23168e-10	-1.31832	0.416	0.593	1.42582e-05
			HSP90AB1	7.79139e-09	-1.37051	0.918	0.934	0.000262523		RPL35A	5.38545e-10	-0.0414348	0.99	0.987	1.81458e-05
			IER3	9.25565e-09	1.07458	0.4	0.241	0.00031186		MT-CO1	5.50549e-10	-0.45039	1	1	1.85502e-05
			ITM2A	9.91762e-09	-1.64541	0.391	0.65	0.000334164		PTGER4	7.02161e-10	-1.45159	0.302	0.515	2.36586e-05
			TSPYL2	1.04656e-08	-1.88935	0.2	0.584	0.000352629		IRF2BP2	9.08626e-10	-1.32399	0.269	0.56	3.06152e-05
			WSB1	1.07887e-08	-1.59502	0.309	0.657	0.000363514		DUSP1	1.4508e-09	-1.14369	0.636	0.772	4.88831e-05
			JMJD1C	1.10639e-08	-1.62215	0.309	0.642	0.000372788		HINT1	1.46602e-09	0.198851	0.862	0.824	4.93962e-05
			CCDC59	1.17839e-08	-1.85743	0.186	0.599	0.000397047		ATP5L	1.87177e-09	0.176751	0.885	0.84	6.30674e-05
			MBNL1	1.52118e-08	-1.41914	0.559	0.81	0.000512548		TNF	2.17222e-09	-2.14299	0.17	0.368	7.31907e-05
			SBDS	1.5902e-08	-1.6468	0.3	0.584	0.000535801		PRPF38B	2.42963e-09	-1.09645	0.479	0.704	8.18641e-05
			RPL31	1.76628e-08	-1.07628	0.873	0.912	0.00059513		TSC22D3	2.69574e-09	-1.09578	0.777	0.879	9.08303e-05
			RANBP2	1.81373e-08	-1.87586	0.236	0.533	0.000611119		AHR	3.06089e-09	-1.62812	0.207	0.472	0.000103134
			UBA52	2.25922e-08	-0.180452	1	1	0.000761223		SLC38A2	3.63073e-09	-1.25662	0.348	0.567	0.000122334
			MACF1	2.35073e-08	-1.70829	0.255	0.613	0.000792056		LCN2	3.68083e-09	1.29234	0.318	0.104	0.000124022
			IRF2BP2	2.51984e-08	-1.8364	0.227	0.562	0.000849033		DDX5	4.66582e-09	-0.88738	0.98	0.987	0.00015721
			GOLGB1	2.5276e-08	-1.6005	0.386	0.672	0.000851649		BRK1	4.84951e-09	0.550579	0.515	0.401	0.000163399
			ZFP36L1	3.04394e-08	-1.44978	0.441	0.737	0.00102563		PNN	5.27751e-09	-1.04732	0.449	0.671	0.000177821
			SF1	3.38846e-08	-1.33994	0.545	0.796	0.00114171		ZC3HAV1	5.62316e-09	-1.18211	0.416	0.642	0.000189467
			TNRC6B	3.43379e-08	-1.47221	0.395	0.65	0.00115698		RPL14	7.25984e-09	-0.0226251	0.977	0.98	0.000244613
			COX6B1	3.76142e-08	0.451356	0.65	0.569	0.00126737		RPS13	8.8619e-09	-0.0180039	0.984	0.984	0.000298593
			RBMX	3.79532e-08	-1.48673	0.336	0.664	0.0012788		RPL3	1.02413e-08	-0.00902483	0.993	0.997	0.00034507
			UQCR10	4.03028e-08	0.477277	0.614	0.489	0.00135796		SMCHD1	1.04461e-08	-1.16002	0.423	0.635	0.000351971
			FYB	4.95378e-08	-1.39299	0.632	0.847	0.00166913		TPT1	1.10539e-08	-0.0684364	0.993	1	0.00037245
			AMD1	5.42999e-08	-1.58405	0.3	0.613	0.00182958		RBBP6	1.42167e-08	-1.3367	0.285	0.521	0.000479018
			KRT8	5.50973e-08	1.0146	0.382	0.234	0.00185645		C14orf2	1.46616e-08	0.418009	0.584	0.472	0.000494008
			CHD2	6.37283e-08	-1.71619	0.268	0.599	0.00214726		FYB	1.59899e-08	-1.00821	0.59	0.798	0.000538765
			RPL38	7.81905e-08	-0.890074	0.945	0.956	0.00263455		CSRNP1	1.63137e-08	-1.22351	0.325	0.524	0.000549673
			SRSF11	8.0358e-08	-1.48881	0.359	0.635	0.00270758		PABPC1	1.71331e-08	-0.880693	0.8	0.853	0.000577284
			TMF1	8.20556e-08	-1.65858	0.255	0.591	0.00276478		CD3D	2.05208e-08	0.0689743	0.938	0.935	0.000691428
			IVNS1ABP	8.92528e-08	-1.59942	0.295	0.562	0.00300728		FAU	2.33318e-08	-0.0538378	0.99	0.99	0.000786142
			SMCHD1	9.83708e-08	-1.42845	0.486	0.693	0.00331451		CHD2	2.48917e-08	-1.26812	0.285	0.541	0.000838702
			DDX3X	1.02109e-07	-1.35258	0.691	0.839	0.00344045		GAPDH	2.54483e-08	0.138969	0.97	0.941	0.000857456
			CHORDC1	1.03498e-07	-1.80628	0.205	0.547	0.00348725		HSPA5	3.50859e-08	-1.05782	0.626	0.739	0.00118219
			TNFAIP3	1.18956e-07	-1.51723	0.623	0.788	0.00400809		RPL7A	3.79228e-08	-0.0392695	0.987	0.977	0.00127777
			SRRM1	1.23009e-07	-1.26705	0.541	0.825	0.00414468		MBNL1	3.94875e-08	-0.955504	0.639	0.775	0.00133049
			SRGN	1.23284e-07	-1.27135	0.864	0.985	0.00415394		FAM133B	4.00621e-08	-1.11603	0.407	0.599	0.00134985
			PTPRC	1.27884e-07	-1.15116	0.909	0.971	0.00430893		YME1L1	4.3091e-08	-1.17873	0.377	0.593	0.00145191
			ATP5E	1.38968e-07	-0.0393406	0.959	0.942	0.00468237		ODC1	4.90221e-08	-1.23622	0.321	0.55	0.00165175
			NDUFB2	1.41022e-07	0.504745	0.568	0.431	0.00475158		STK17B	5.41257e-08	-1.01052	0.643	0.821	0.00182371
			ADGRE5	2.16857e-07	-1.95666	0.173	0.526	0.00730677		PSME2	5.82041e-08	0.365705	0.675	0.577	0.00196113
			GPCPD1	2.21513e-07	-2.47546	0.1	0.474	0.00746366		SERF2	6.15532e-08	0.0274684	0.967	0.945	0.00207397
			JOSD1	2.28766e-07	-1.64546	0.223	0.613	0.00770803		ABRACL	6.84457e-08	0.381894	0.616	0.508	0.00230621
			HSPE1	2.38974e-07	-1.27191	0.445	0.766	0.008052		DNAJB6	7.37937e-08	-0.981439	0.462	0.658	0.00248641
			IDI1	2.83834e-07	-1.58903	0.309	0.577	0.00956349		RUNX3	7.40446e-08	-0.990021	0.534	0.736	0.00249486
			MT-CO1	3.27243e-07	-0.87461	1	0.993	0.0110261		FTH1	7.75604e-08	0.0160418	0.987	0.987	0.00261332
			ANXA2	3.28391e-07	0.675322	0.459	0.27	0.0110648		KMT2E	7.94974e-08	-1.01762	0.538	0.687	0.00267858
			RPS24	3.77202e-07	-0.252611	1	1	0.0127094		RPS27	8.06469e-08	-0.117158	0.997	0.997	0.00271732
			ATRX	4.11534e-07	-1.38017	0.459	0.745	0.0138662		GOLGB1	8.9204e-08	-1.10344	0.462	0.625	0.00300564
			ARID4B	4.62024e-07	-1.34237	0.468	0.745	0.0155675		HNRNPH1	9.13298e-08	-0.891698	0.525	0.723	0.00307727
			SON	4.74471e-07	-1.17721	0.786	0.927	0.0159868		TFF3	9.24711e-08	2.35122	0.249	0.042	0.00311572
			MT-CYB	5.24085e-07	-0.830014	1	1	0.0176585		HSP90AB1	9.83935e-08	-1.05637	0.948	0.919	0.00331527
			COX4I1	5.70666e-07	0.0613889	0.827	0.825	0.019228		CITED2	1.01554e-07	-1.38002	0.262	0.495	0.00342176
			HSPA5	6.31319e-07	-1.29202	0.545	0.759	0.0212717		PPP1R15B	1.0712e-07	-1.63202	0.167	0.456	0.0036093
			NEU1	6.59134e-07	-2.33012	0.118	0.482	0.0222089		RPS18	1.18838e-07	-0.0948808	0.997	0.993	0.00400413
			ATM	6.70496e-07	-1.49224	0.286	0.577	0.0225917		TMEM258	1.26514e-07	0.352327	0.626	0.57	0.00426277
			YTHDC1	6.86225e-07	-1.483	0.323	0.606	0.0231217		MT-ND5	1.29663e-07	-0.642281	0.941	0.974	0.00436885
			RSRC2	7.08155e-07	-1.34556	0.436	0.708	0.0238606		BDP1	1.6048e-07	-1.19168	0.331	0.573	0.00540722
			EEF1A1	7.23073e-07	-0.731763	1	1	0.0243632		GADD45B	1.62205e-07	-1.57766	0.318	0.573	0.00546533
			ZNF331	7.25417e-07	-1.6433	0.409	0.715	0.0244422		UQCR10	2.25493e-07	0.329878	0.623	0.518	0.00759777
			DDX21	7.58711e-07	-1.42256	0.391	0.635	0.025564		BPTF	2.49908e-07	-1.01166	0.449	0.655	0.0084204
			CD7	7.59764e-07	0.49366	0.632	0.533	0.0255995		TUBA1B	2.73571e-07	-0.910287	0.544	0.713	0.0092177
			LMNA	9.06193e-07	-1.52792	0.45	0.657	0.0305333		TMA7	2.78207e-07	0.111498	0.885	0.847	0.00937391
			HLA-E	9.41686e-07	-1.14246	0.859	0.978	0.0317292		UBL5	2.94749e-07	0.150603	0.797	0.756	0.00993127
			ANXA1	9.72476e-07	-1.59073	0.577	0.686	0.0327666		NFKBIA	3.34557e-07	-1.16242	0.659	0.795	0.0112725
			S100A11	9.84682e-07	0.144913	0.764	0.657	0.0331779		GZMA	3.518e-07	0.7549	0.518	0.498	0.0118536
			UBE2S	1.04939e-06	-1.42441	0.373	0.693	0.0353582		GNB2L1	3.94486e-07	0.0190679	0.967	0.961	0.0132918
			S100A9	1.16711e-06	0.717508	0.386	0.277	0.0393245		CXCR4	4.57391e-07	0.405739	0.757	0.775	0.0154113
			PPP1R10	1.20682e-06	-1.27465	0.505	0.723	0.0406627		COX4I1	4.60342e-07	0.0904286	0.852	0.863	0.0155108
			ATP5I	1.41945e-06	0.380749	0.591	0.489	0.0478268		KTN1	4.87354e-07	-1.00454	0.413	0.629	0.0164209
										SMARCA5	5.24092e-07	-1.03406	0.43	0.577	0.0176588
										UQCRB	6.21388e-07	0.0725136	0.83	0.814	0.0209371
										RP11-489E7.4	6.34722e-07	-1.50573	0.213	0.433	0.0213863
										SSR4	6.60888e-07	0.18344	0.8	0.743	0.022268
										HNRNPA2B1	6.61893e-07	-0.83292	0.846	0.902	0.0223018
										ZFP36L2	6.81618e-07	-1.13754	0.741	0.86	0.0229664
										TLE4	7.49274e-07	-1.25249	0.282	0.511	0.025246
										RPS16	8.13573e-07	-0.119585	0.99	0.997	0.0274125
										CHD1	8.41007e-07	-1.16453	0.315	0.521	0.0283369
										HEXIM1	8.69199e-07	-1.33055	0.223	0.476	0.0292868
										PCF11	8.86512e-07	-1.31227	0.233	0.459	0.0298701
										SYNE2	9.1583e-07	-1.01998	0.567	0.697	0.030858
										WSB1	9.23179e-07	-0.98613	0.393	0.606	0.0311056
										C4orf48	9.42617e-07	0.52243	0.38	0.29	0.0317605
										GOLGA8B	1.00808e-06	-1.64174	0.138	0.443	0.0339663
										EEF1B2	1.2237e-06	0.0229968	0.918	0.87	0.0412313
										EML4	1.24594e-06	-0.988051	0.561	0.7	0.0419807
										CDV3	1.26714e-06	-1.05096	0.462	0.642	0.042695
										EEF1D	1.32259e-06	0.0638817	0.934	0.906	0.0445633
										EIF4G2	1.33584e-06	-0.849759	0.675	0.769	0.0450099
										C19orf53	1.35306e-06	0.273496	0.646	0.541	0.0455899
										AP000769.1	1.36341e-06	-1.40572	0.249	0.466	0.0459387
										ZFAND5	1.45761e-06	-1.04382	0.384	0.547	0.0491127
